# Supplementary material for: Ntrk1 mutation co-segregating with bipolar disorder and inherited kidney disease in a multiplex family causes defects in neuronal growth and depression-like behavior in mice
Source: PubMed Central journal article supplement (PMC7687911; doi:10.1038/s41398-020-01087-8), 2020-11-24
Supplement: 41398_2020_1087_MOESM1_ESM.pdf [file 41398_2020_1087_MOESM1_ESM.pdf]

a)

| Subject | Psychiatric Diagnosis        | Comorbidities                                                                              | Age of Onset (psychiatric symptoms) | Age of Onset (ESRD) |
|---------|------------------------------|--------------------------------------------------------------------------------------------|-------------------------------------|---------------------|
| 1       | Major Depression             | ADTKD; alcoholism/substance dependency; panic disorder                                     | 19                                  | 34                  |
| 2       | Bipolar Type I               | ADTKD; alcoholism/substance dependency; psychosis; rapid cycling, anorexia; panic disorder | 7                                   | 18                  |
| 3       | Generalized Anxiety Disorder | Alcoholism                                                                                 | n/a                                 | none                |
| 4       | Bipolar Type I               | ADTKD                                                                                      | n/a                                 | n/a                 |
| 5       | Major Depression             | n/a                                                                                        | n/a                                 | none                |
| 6       | Bipolar Type I               | ADTKD; alcoholism/substance dependency; psychosis; rapid cycling,                          | 12                                  | 24                  |
| 7       | Hyperthymia                  | ADTKD; short sleep periods                                                                 | n/a                                 | 35                  |
| 8       | Bipolar Type I               | ADTKD; psychosis; alcoholism/substance dependency                                          |                                     |                     |
| 9       | Bipolar Type I               | ADTKD; alcoholism/substance dependency; psychosis                                          | 28                                  | ~30                 |
| 10      | Major Depression             | n/a                                                                                        | n/a                                 | none                |
| 11      | Bipolar Type I               | ADTKD; substance abuse                                                                     | n/a                                 | n/a                 |
| 12      | Major Depression             | ADTKD                                                                                      | n/a                                 | n/a                 |
| 13      | Unknown                      | n/a                                                                                        | n/a                                 | n/a                 |
| 14      | Psychiatrically healthy      | n/a                                                                                        | none                                | none                |
| 15      | Psychiatrically healthy      | ADTKD; Gout                                                                                | n/a                                 | n/a                 |
| 16      | Unknown                      | n/a                                                                                        | n/a                                 | none                |
| 17      | Major Depression             | ADTKD; Anxiety; sleep and memory complaints                                                | n/a                                 | 24                  |
| 18      | Bipolar Type II              | ADTKD; Anxiety; Sleep and memory complaints                                                | n/a                                 | 22                  |
| 19      | Unknown                      | ADTKD                                                                                      | n/a                                 | n/a                 |

b)

| Age of ESRD     |     |         |       |
|-----------------|-----|---------|-------|
| Family          | N   | Average | Stdev |
| 6807            | 13  | 33.46   | 9.51  |
| All other ADTKD | 239 | 43.52   | 13.77 |

**Supplementary Figure 1. Clinical summary of patients.** Autosomal dominant tubulo-interstitial kidney disease (ADTKD); End stage renal disease (ESRD); a) Summary of psychiatric clinical diagnoses for available family members and spouses of 1<sup>st</sup>- 3<sup>rd</sup> generation, including additional comorbidities, age of onset for psychiatric symptoms and age of onset for ADTKD symptoms. “n/a” indicates when information is unavailable and “none” indicates information is not relevant for the patient. b) Average age of ESRD in family 6807, is significantly lower when compared to all other known ADTKD cases. ( $p = 0.009933$ )

| Filter Method                | SNP Type                               | Genome         | Exome       |
|------------------------------|----------------------------------------|----------------|-------------|
| First Pass: all SNPs         | Total                                  | 3,333,079      | 108,976     |
|                              | TiTv Ratio (All)                       | 2.05           | 2.21        |
|                              | TiTv Ratio (novel)                     | 1.73           | 1.61        |
|                              | Ti Tv Ratio (dbSNP)                    | 2.10           | 2.29        |
|                              | No. in dbSNP 129 (%)                   | 2,909,250 (87) | 97,914 (90) |
|                              | Concordance with dbSNP (%)             | 99.87          | 99.79       |
|                              | No. not in dbSNP                       | 423,829        | 11,062      |
|                              | No. not in 1000 Genomes                | 242,057        | 7,116       |
|                              | No. not in 12 exomes                   | 241,918        | 6,960       |
|                              | All Coding Variants (CDS)              | 22,304         | 20,244      |
| Second Pass: all Coding SNPs | TiTv Ratio (All)                       | 2.82           | 2.86        |
|                              | TiTv Ratio (novel)                     | 1.80           | 1.72        |
|                              | Ti Tv Ratio (dbSNP)                    | 2.98           | 3.03        |
|                              | Homozygote                             | 8,910          | 8,232       |
|                              | Heterozygote                           | 13,330         | 12,008      |
|                              | Synonymous                             | 10,959         | 10,245      |
|                              | Missense                               | 11,281         | 9,995       |
|                              | Nonsense                               | 141            | 103         |
|                              | Splice Site                            | 310            | 267         |
|                              | Novel Coding Variants (CDS)            | 2,087          | 1,767       |
| Third pass: all Novel SNPs   | TiTv Ratio (novel)                     | 1.87           | 1.52        |
|                              | No. not in 1000 Genomes                | 1,001          | 1,000       |
|                              | No. not in 12 exomes                   | 932            | 860         |
|                              | Synonymous                             | 291            | 280         |
|                              | Missense                               | 639            | 580         |
|                              | Missense in CCDS                       | 393            | 431         |
|                              | Homozygote or Compound Heterozygote    | 298            | 371         |
|                              | Homozygote                             | 8              | 12          |
|                              | Heterozygote                           | 289            | 359         |
|                              | Nonsense                               | 5              | 14          |
| Fourth Pass: Linkage Region  | Splice Site                            | 6              | 8           |
|                              | Linked to Disease (HGMD)               | 75             | 92          |
|                              | Novel, Missense under linkage peaks    | 43             | 49          |
|                              | Homozygote                             | 0              | 0           |
|                              | Heterozygote                           | 43             | 49          |
|                              | Linked to disease (HGMD)               | 9              | 15          |
|                              | Associated with Neurological condition | 1              | 2           |
|                              | Associated with Kidney Condition       | 2              | 3           |
|                              | Complex Disease                        | 4              | 7           |
|                              | Mendelian Disease                      | 3              | 3           |

**Supplementary Figure 2. Sequencing and SNP filtering Summary A.** Sequencing was performed over a number of platforms including Illumina Genome Analyzer I, Genome Analyzer II, and a HiSeq 2000. **B.** Multiple pass, hypothesis driven SNP filtering method was applied where all available databases was used to filter out common variants. We used dbSNP129, 1000 Genomes Project and common variants deposited to the public domain from 12 human exomes. Quality analysis indicated that the transition/transversion ratio of novel coding variants were under the 3.0 expected ratio, indicating challenges in calling variants correctly without false positive call inflation.

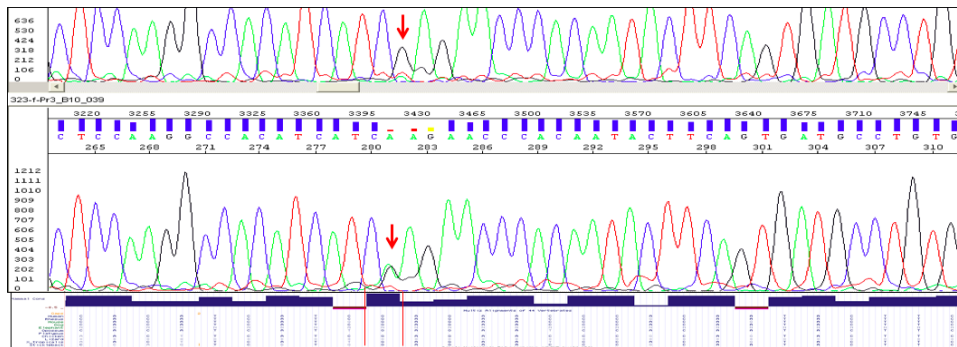

**Supplementary Figure 3 Sanger sequencing confirms variant in affected family members**  
 Family members and study participant were Sanger sequenced for the G>A nucleotide change and two traces are shown from data analysis. The trace on top indicates member #5 and associated homozygous to reference genotype (red arrow). Figure 1 shows the complete result of the Sanger sequencing validation. The locus is highly conserved across species visible under the Sanger traces, highlighted with red bars.
